# Supplementary figures and images for: Community implementation of the 3 Wishes Project: an observational study of a compassionate end-of-life care initiative for critically ill patients
Source: PubMed Central journal article supplement — CMAJ Open. 2021 Jul 20;9(3):E757–64. doi: 10.9778/cmajo.20200273 (PMC8313093; doi:10.9778/cmajo.20200273), 2021-07-20

## Step-by-Step Process for Initiating the 3 Wishes Project

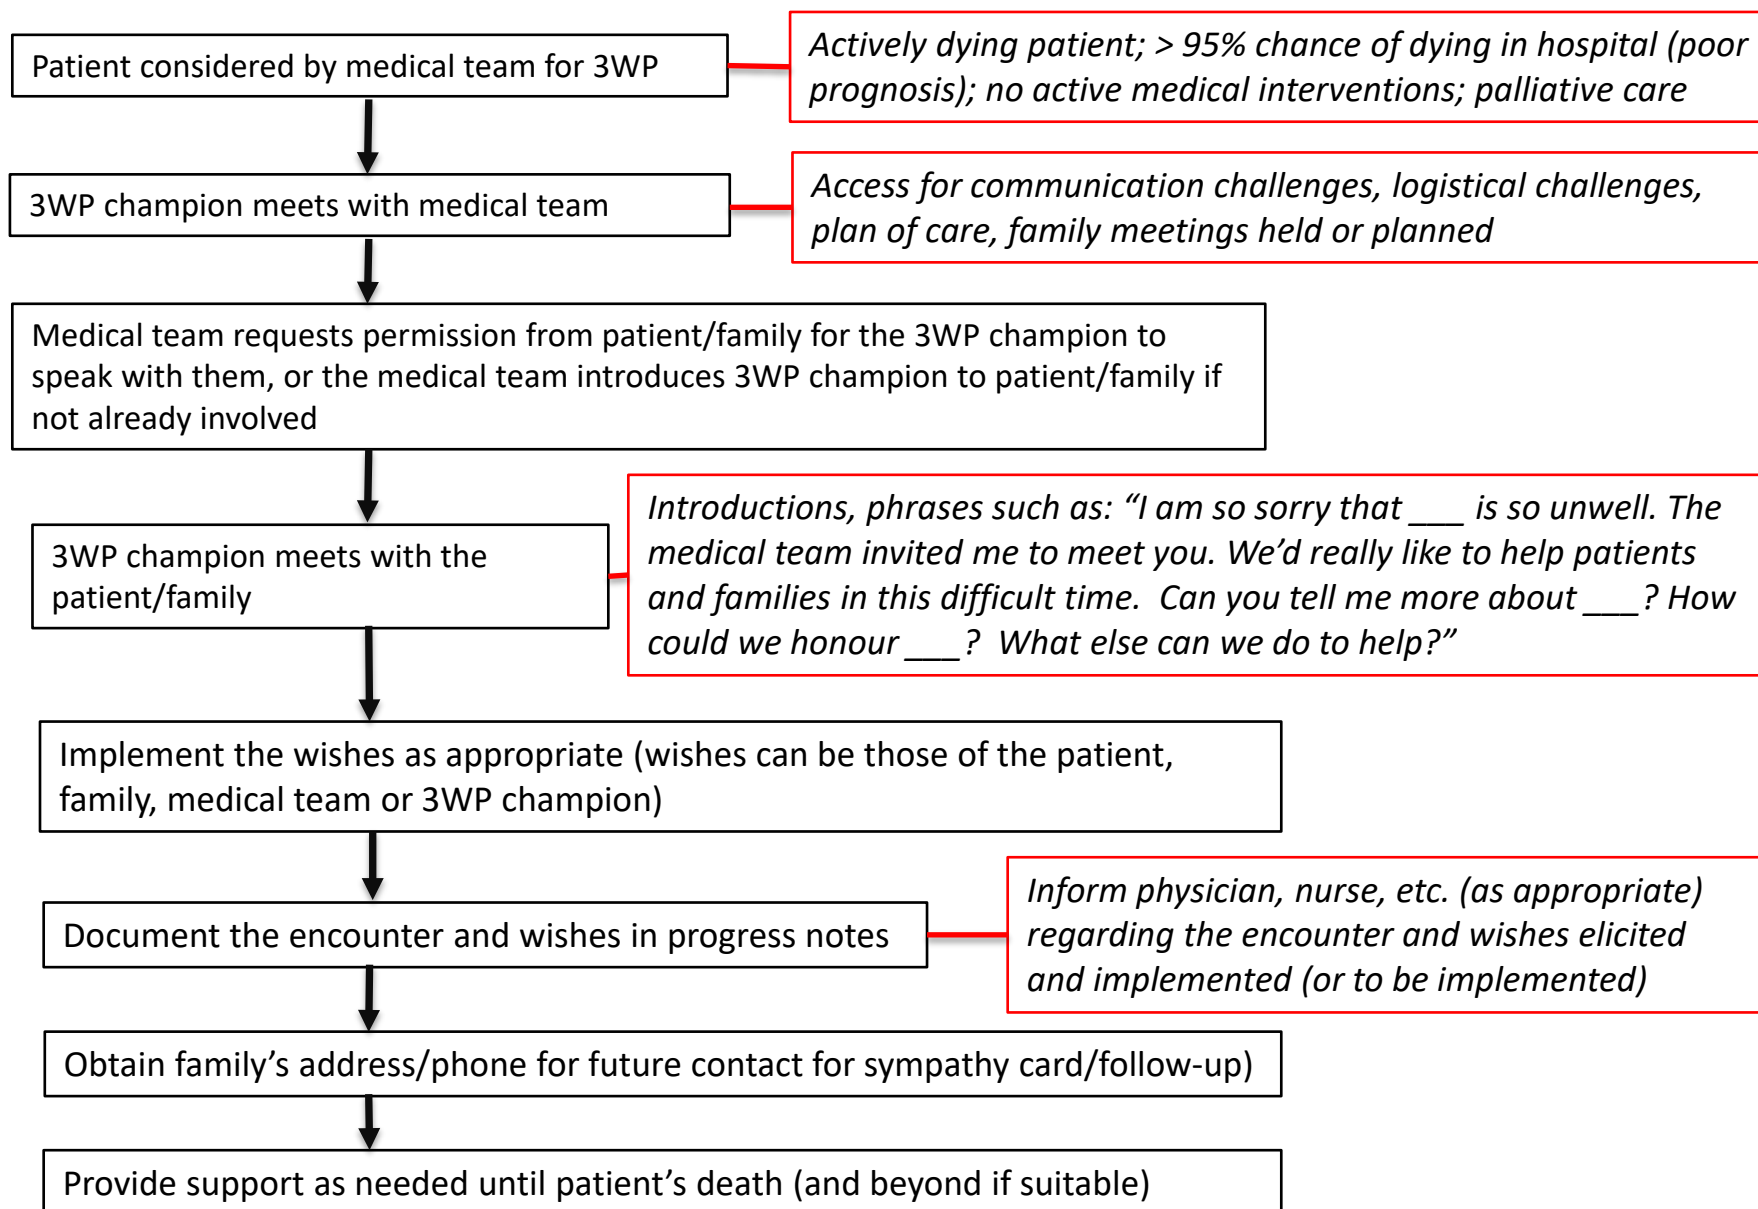

Supplement: 2020-0273-1-at.pdf [file 2020-0273-1-at.pdf]
